# Supplementary material for: Reduction in and Preventive Effects for Oral-Cancer Risk with Antidepressant Treatment
Source: MDPI journal article supplement (doi:10.3390/jpm11070591), 2021-06-23
Supplement: s1 [file s1]

Supplementary figures and tables

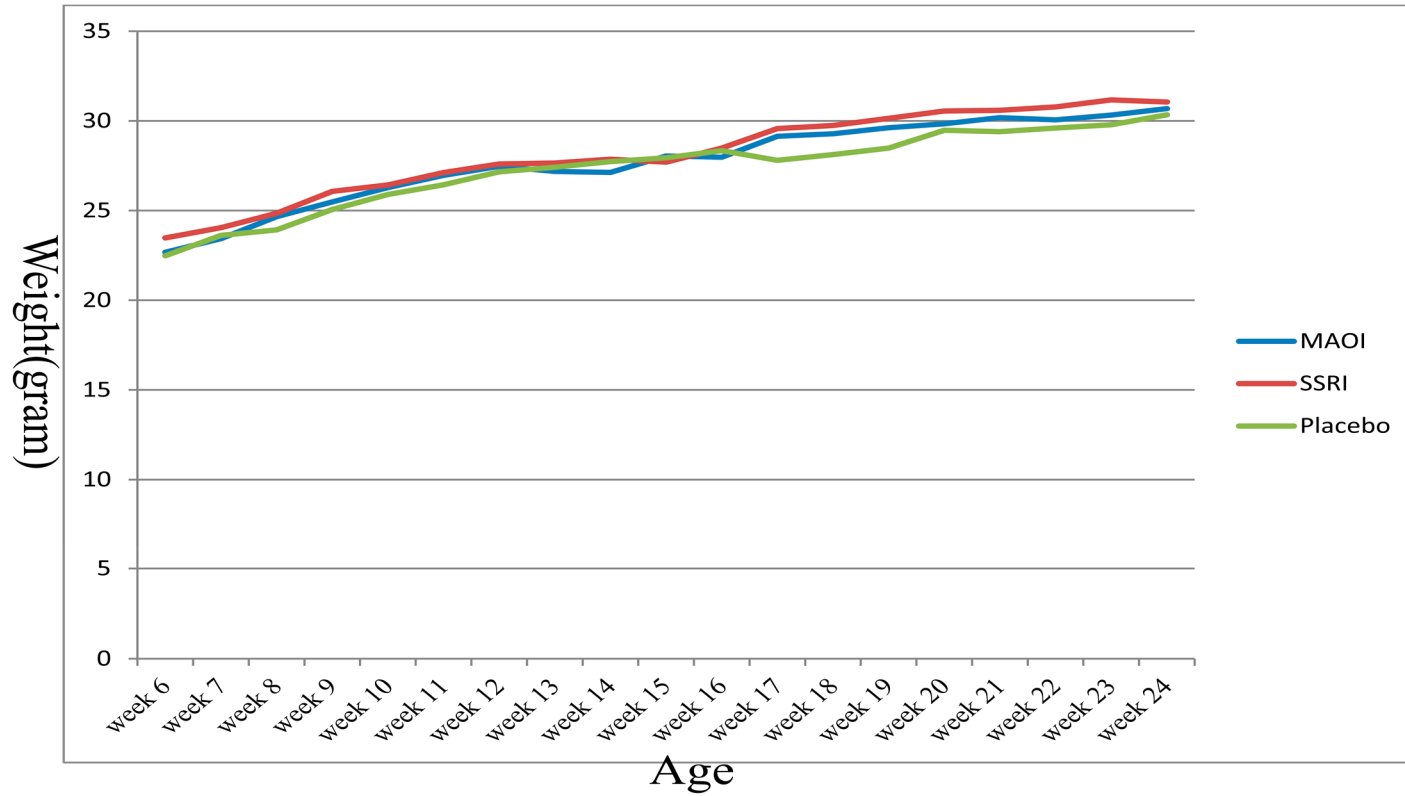

**Supplementary Figure S1. Comparison of body weight changes with long-term areca nut treatment among MAOI, SSRI and Placebo groups.**

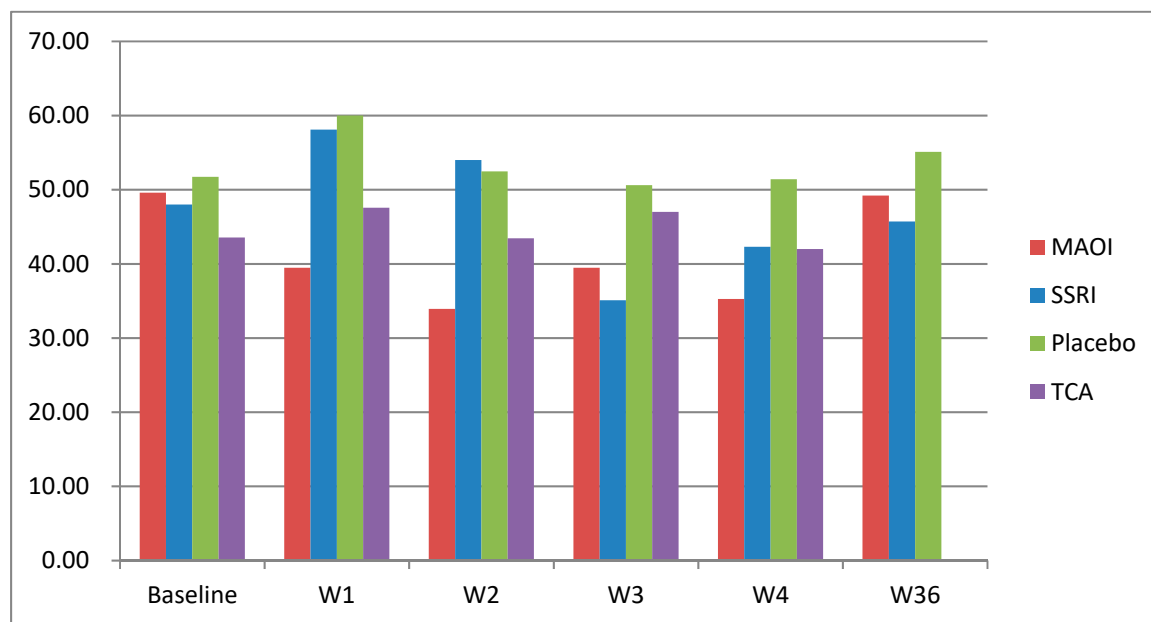

**Supplementary Figure S2 Comparison in consumption amount of areca nut water after antidepressants treatment in mouse mode (follow-up 4 weeks and 36 weeks). TCA group was not significantly decreased in consumption amount of areca nut compared to placebo group. The follow-up period was halted at fourth weeks after treatment.**

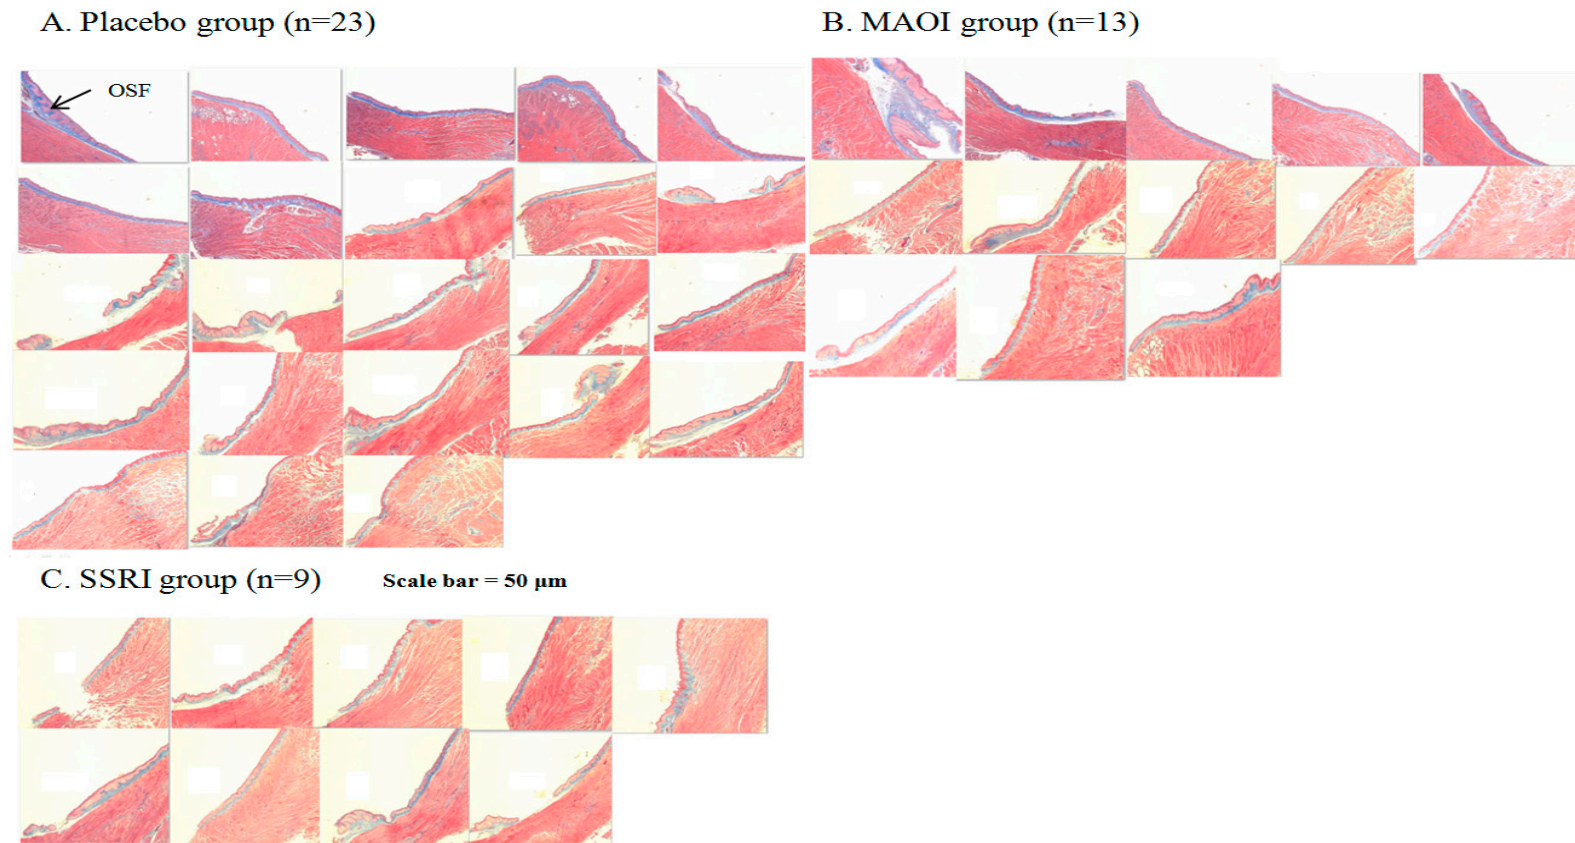

**Supplementary Figure S3. H&E trichrome of oral submucous fibrosis in the mouse tongue tissue. Photomicrograph showing oral submucous fibrosis (Blue color) in mouse tongue tissue. Scale bar = 50  $\mu$ m. A: placebo group (n=23), B. MAOI group (n=13), C. SSRI group (n=9).**

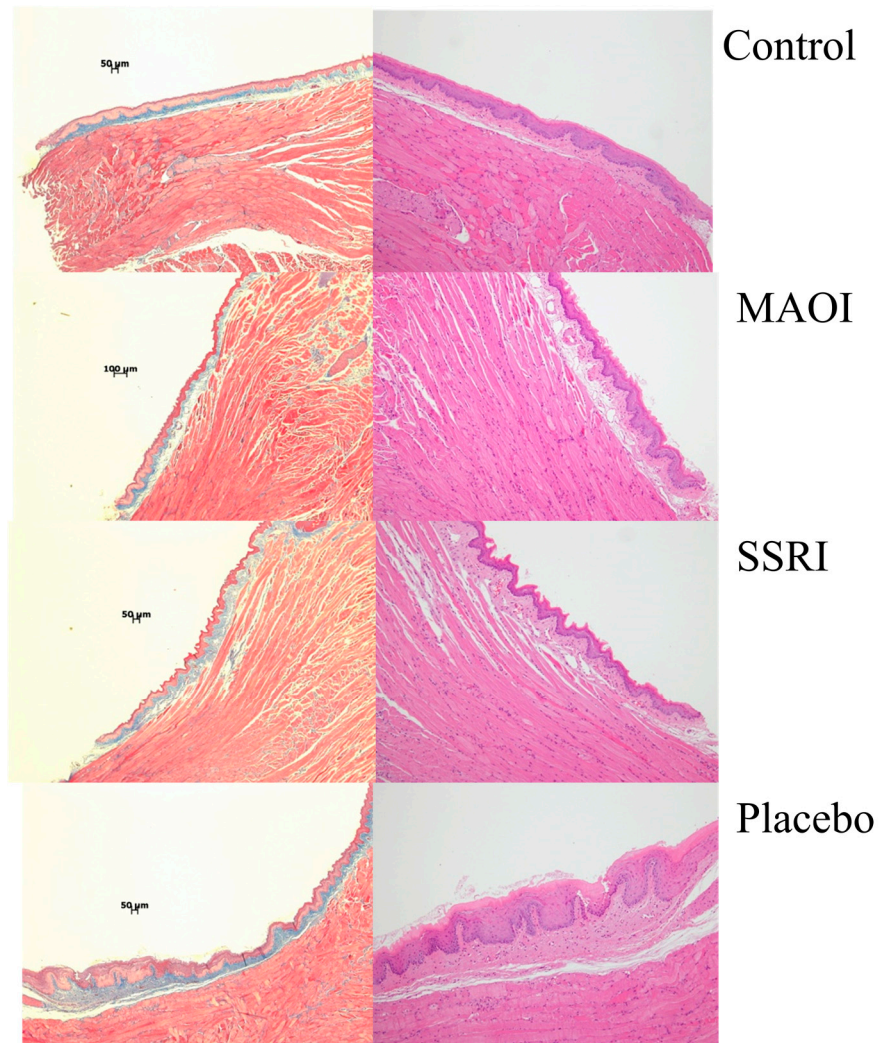

**Supplementary Figure S4 H&E trichrome of oral submucous fibrosis in the selective and paired mouse tongue tissue**

**Supplementary Table S1. Changes in consumption amount (averaged ml/ weekly) of area nut water after antidepressants treatment analyzed by GEE model**

| Scale                 | Placebo, Mean $\pm$ SD ( <i>n</i> ) | MAOI $\pm$ SD ( <i>n</i> ) | SSRI, Mean $\pm$ SD ( <i>n</i> ) | MAOI     |      |       |        | SSRI     |      |       |      |
|-----------------------|-------------------------------------|----------------------------|----------------------------------|----------|------|-------|--------|----------|------|-------|------|
|                       |                                     |                            |                                  | Estimate | SEM  | Z     | p      | Estimate | SEM  | Z     | p    |
| Baseline              | 21.7 $\pm$ 4.92(15)                 | 19.6 $\pm$ 4.19(15)        | 18 $\pm$ 11.6(10)                |          |      |       |        |          |      |       |      |
| Week 1-2              | 26.2 $\pm$ 4.19(15)                 | 6.7 $\pm$ 8.96(15)         | 26.05 $\pm$ 11.4(10)             | 0.15     | 0.07 | 2.29  | 0.02   | 0.08     | 0.04 | 1.85  | 0.06 |
| Week 3-4              | 21.0 $\pm$ 6.30(15)                 | 7.4 $\pm$ 5.08(15)         | 8.2 $\pm$ 4.3(10)                | -0.02    | 0.03 | -0.79 | 0.43   | -0.01    | 0.03 | -0.50 | 0.62 |
| Week 36               | 25.1 $\pm$ 5.84(15)                 | 19.2 $\pm$ 4.15(15)        | 15.7 $\pm$ 5.46(10)              | 0.03     | 0.01 | 1.94  | 0.05   | 0.03     | 0.01 | 2.01  | 0.04 |
| Drug                  |                                     |                            |                                  |          |      |       |        |          |      |       |      |
| Week1-2 $\times$ drug |                                     |                            |                                  | -0.38    | 0.09 | -4.09 | <.0001 | 0.07     | 0.08 | 0.90  | 0.37 |
| Week3-4 $\times$ drug |                                     |                            |                                  | -0.27    | 0.08 | -3.35 | <.0001 | -0.21    | 0.11 | -2.02 | 0.04 |
| Week 36 $\times$ drug |                                     |                            |                                  | -0.03    | 0.02 | -2.32 | 0.02   | -0.08    | 0.08 | -0.99 | 0.32 |
